# Supplementary material for: Electrostatic self-assembly synthesized Fe-MOF/g-C 3 N 4 S-scheme heterojunction for enhanced photocatalytic pollutant degradation
Source: Royal Society of Chemistry journal article supplement (doi:10.1039/d5ra04928h), 2025-01-01
Supplement: d5ra04928h1.pdf [file d5ra04928h1.pdf]

## Supporting Information:

### Electrostatic Self-Assembly Synthesized Fe-MOF/g-C<sub>3</sub>N<sub>4</sub> S-Scheme Heterojunction for Enhanced Photocatalytic Pollutant Degradation

Hongqiang Xin,<sup>\*a</sup> Jingpu Zhang,<sup>b</sup> Zeming Lin,<sup>a</sup> Wen Li,<sup>c</sup> and Fei Ma <sup>\*b</sup>

---

<sup>a</sup> Lanzhou Jiaotong University, School of New Energy and Power Engineering, 88 Anning West Road, Anning District, Lanzhou, Gansu, China. E-mail: [klxhq@163.com](mailto:klxhq@163.com)

<sup>b</sup> Xi'an Jiaotong University, State Key Laboratory for Mechanical Behavior of Materials, 28 Xianning West Road, Xi'an, Shaanxi, China. E-mail: [mafei@mail.xjtu.edu.cn](mailto:mafei@mail.xjtu.edu.cn)

<sup>c</sup> Southwest Jiaotong University, Materials Science and Engineering, 999 Xi'an Road, Pidu District, Chengdu, Sichuan, China

---

## Experimental Methods

**Preparation of g-C<sub>3</sub>N<sub>4</sub> (CN):** Aluminum foil was used to cover a crucible that contained 10 g of urea. Bulk C<sub>3</sub>N<sub>4</sub> was produced by heating to 550 °C at a rate of 5 °C/min, keeping it there for 4 hours in a muffle furnace, and then letting it cool to room temperature. To create g-C<sub>3</sub>N<sub>4</sub>, the powder was dissolved in 50 mL of pure ethanol, subjected to an ultrasonic treatment for 18 hours, centrifuged, and dried.

**Preparation of Fe-MOF:** The hydrothermal process was used to create Fe-MOF. Fumaric acid (1.16 g) and iron (III) chloride hexahydrate (1.62 g) were dissolved in 100 mL of N, N-dimethylformamide while being stirred and heated at 120 °C for two hours. After five cycles of centrifugal washing with deionized water and cooling to room temperature, MIL88A (Fe-MOF) was produced.

**Preparation of Fe-MOF/g-C<sub>3</sub>N<sub>4</sub>:** Powders of Fe-MOF and g-C<sub>3</sub>N<sub>4</sub> were mixed and ground for 30 minutes. Obtained porous Fe-MOF/CN materials were calcined in a tube furnace under 350 °C for 2 h. On the basis of the different reactant mass ratio of Fe-MOF and g-C<sub>3</sub>N<sub>4</sub> that is 1:10, 2:10, 3:10, 4:10, and 5:10, and the products are denoted MCN1-10, MCN2-10, MCN3-10, MCN4-10, and MCN5-10, respectively.

### Microstructural Characterizations

The X-ray diffraction (XRD) patterns of the materials were obtained using Cu K $\alpha$  radiation on a Bruker D8 Advance diffractometer. Fourier-transform infrared (FT-IR) spectra were recorded using an IN10+IZ10 spectrometer. The morphology and microstructure of the samples were characterized by transmission electron microscopy (TEM, JEM-2100F) and scanning electron microscopy (SEM, SU 8230). Elemental distribution was analyzed using an energy-dispersive X-ray (EDX) spectrophotometer attached to the TEM. Nitrogen adsorption-desorption isotherms were measured using a BELSORP-Max analyzer. The chemical composition and elemental states were determined by X-ray photoelectron spectroscopy (XPS, Thermo Fisher ESCALAB Xi+). UV-Vis diffuse reflectance spectra were acquired using a PELambda950 spectrophotometer. Photoluminescence (PL) spectra were recorded on a Perkin Elmer LS55 fluorophotometer. Electron paramagnetic resonance (EPR) signals were collected using an A300-9.5/12 spectrophotometer.

### Photoelectrochemical Measurements

A 300 W xenon lamp was used as the simulated sunlight source. The photocatalytic performance of the materials was evaluated using Rhodamine B (RhB) as the target pollutant under visible light irradiation. In a typical experiment, 30 mg of the photocatalyst was dispersed in 30 mL of an aqueous RhB solution (0.1 g/L). The suspension was stirred in the dark for 0.5 h to achieve adsorption-desorption equilibrium, followed by irradiation under the xenon lamp. At 10-minute intervals, 1 mL of the solution was collected and filtered through a 0.22  $\mu$ m membrane. The absorbance of the filtrate was measured using a UV-Vis spectrophotometer (Shimadzu UV3600) to determine the RhB concentration. The photocatalytic efficiency ( $\eta$ ) was calculated using the following formula:

$\eta = C_t/C_0 \#(1)$  in which  $C_0$  is the initial concentration of RhB (mg/L);  $C_t$  is the concentration of RhB after time  $t$  (mg/L). The reaction rate constant  $k_{obs}$  ( $\text{min}^{-1}$ ) is calculated as:

$$\ln C_t = \ln C_0 - k_{obs} \cdot t \#(2)$$

Electrochemical measurements were performed on a CHI electrochemical workstation (Shanghai Chenhua Instrument Co., Ltd., China) using a three-electrode system. Ag/AgCl and platinum were used as the reference and counter electrodes, respectively. The working electrode was prepared by depositing the catalyst on an FTO glass substrate with an active area of  $2 \times 2 \text{ cm}^2$ . The electrolyte used was 0.5 M sodium sulfate.

### Free Radical Trapping Experiments

To identify the active species involved in the photocatalytic process, radical trapping experiments were conducted. Before illumination, 1 mL of isopropanol (IPA), 0.1 g of benzoquinone (BQ), and 0.3 g of ethylenediaminetetraacetic acid (EDTA) were added to the RhB solution to scavenge hydroxyl radicals ( $\cdot\text{OH}$ ), superoxide radicals ( $\cdot\text{O}_2^-$ ), and holes ( $h^+$ ), respectively. The remaining procedures were identical to the photocatalytic degradation experiments. Based on these experiments, the photocatalytic reaction mechanism was further elucidated.

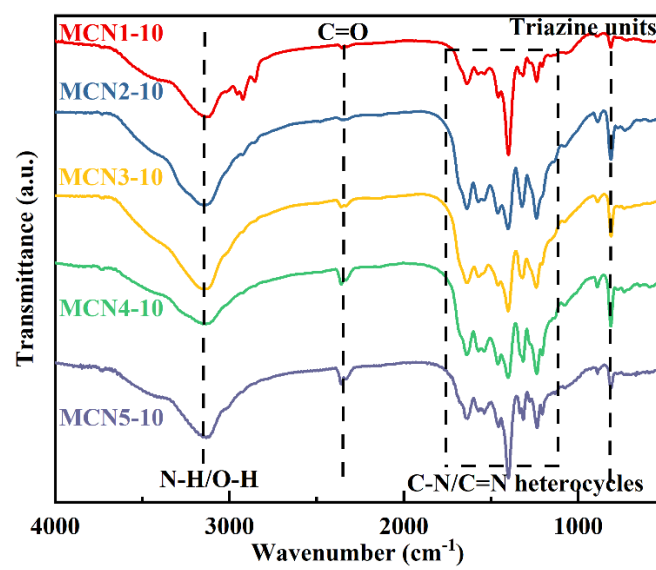

Fig. S1. FT-IR patterns of MCNx.

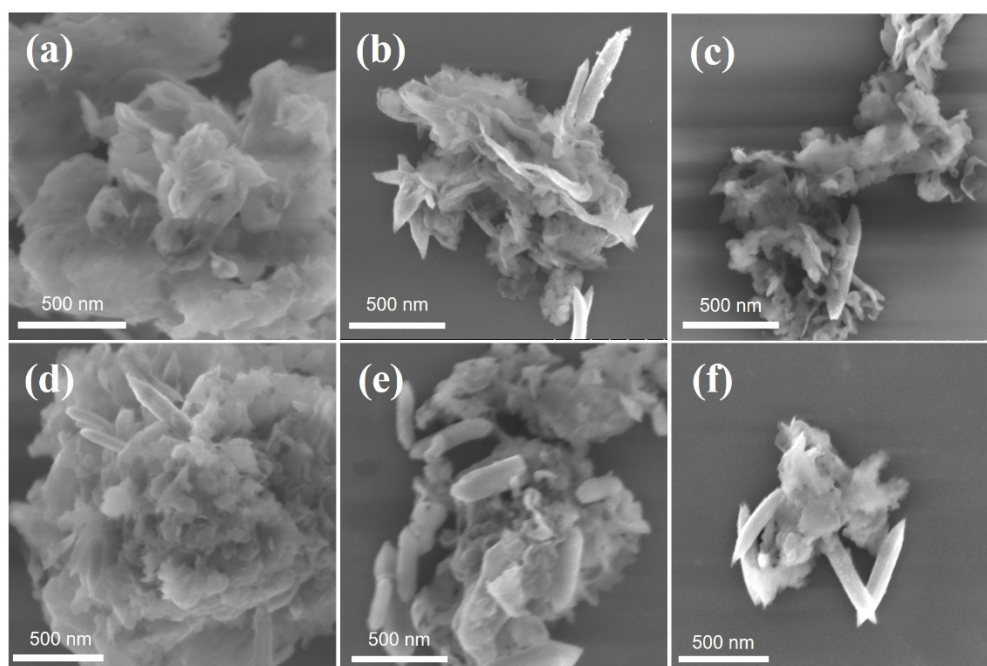

**Fig. S2.** SEM image of (a) g-C<sub>3</sub>N<sub>4</sub>, (b)MCN1-10, (c) MCN2-10, (d) MCN3-10, (e) MCN4-10, (f) MCN5-10.

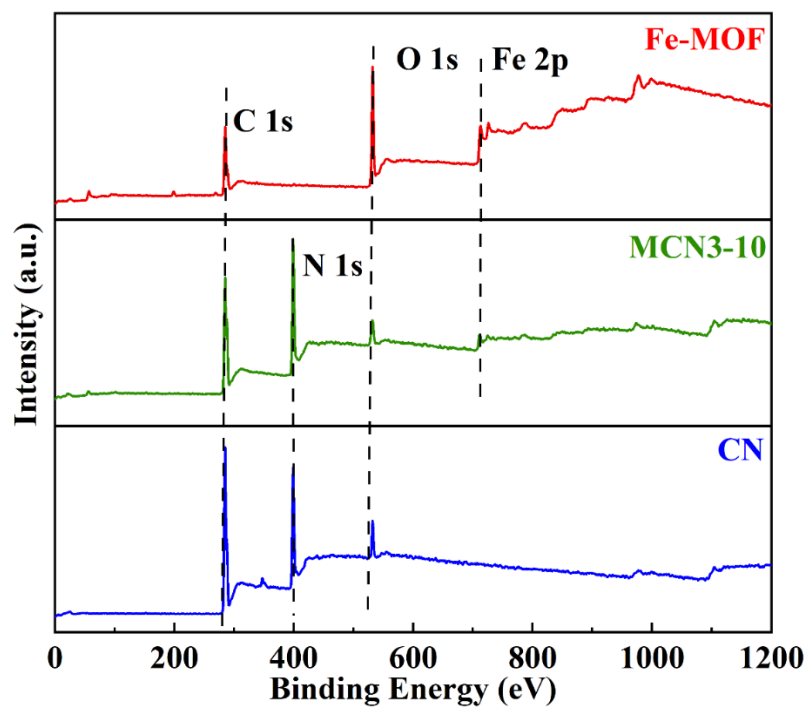

**Fig. S3.** XPS spectroscopy of survey for Fe-MOF, CN and MCN3-10.

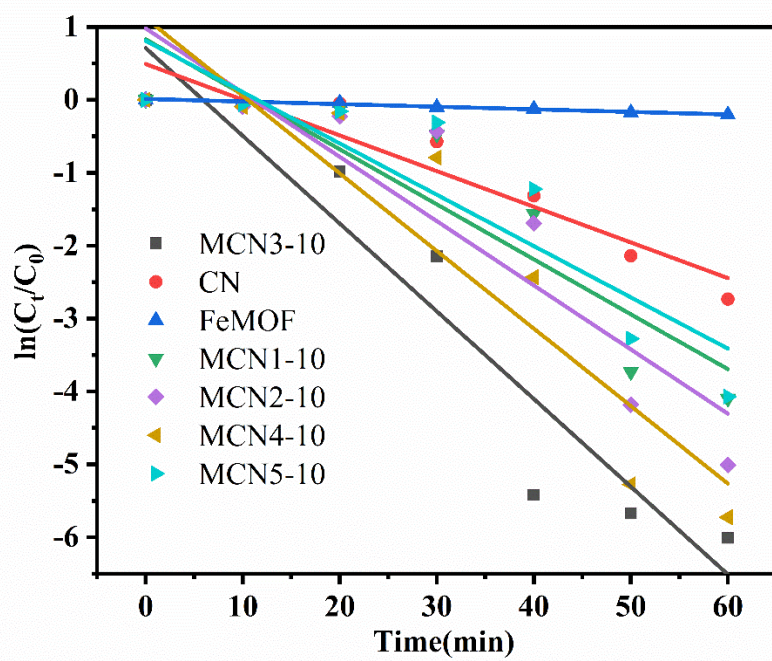

Fig.S4. Linear plots of  $\ln(C_t/C_0)$  vs. time for for all samples.

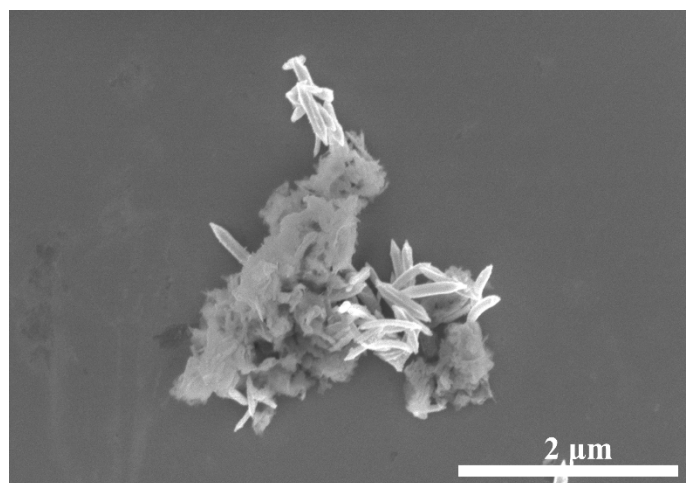

**Fig.S5.** The SEM image of MCN3-10 after five consecutive cycles.

**Table S1.** MOF/g-C<sub>3</sub>N<sub>4</sub>-based photocatalysts for RhB degradation in comparison with recently reported studies.

| Photocatalysts                                                  | synthesis method                                       | degradation time | Stability | Reference                                                                                                    |
|-----------------------------------------------------------------|--------------------------------------------------------|------------------|-----------|--------------------------------------------------------------------------------------------------------------|
| MOF/g-C <sub>3</sub> N <sub>4</sub>                             | electrostatic self-assembly                            | 40min            | 90%       | This work                                                                                                    |
| MOF-5/g-C <sub>3</sub> N <sub>4</sub>                           | mechanical grinding method                             | 90min            | 90%       | [S1] <i>Environmental Science and Pollution Research</i> , 2024, <b>31</b> , 60298-60313.                    |
| g-C <sub>3</sub> N <sub>4</sub> @MOF                            | the phase inversion method                             | 180min           | 90%       | [S2] <i>Surfaces and Interfaces</i> , 2024, <b>55</b> , 105399.                                              |
| Ni-MOF/g-C <sub>3</sub> N <sub>4</sub>                          | integrated                                             | -                | 92%       | [S3] <i>ACS ES&amp;T Water</i> , 2024, <b>4</b> , 4454-4463.                                                 |
| Fe <sub>2</sub> O <sub>3</sub> /g-C <sub>3</sub> N <sub>4</sub> | thermal polymerization and <u>hydrothermal methods</u> | 150min           | -         | [S4] <i>Spectrochimica Acta Part A: Molecular and Biomolecular Spectroscopy</i> , 2024, <b>310</b> , 123972. |
| graphene quantum dots/g-C <sub>3</sub> N <sub>4</sub>           | sonication-assisted mechanochemical approach           | 120min           | -         | [S5] <i>Scientific Reports</i> , 2025, <b>15</b> , 27276.                                                    |
| ZnO/g-C <sub>3</sub> N <sub>4</sub>                             | single-step calcination                                | -                | -         | [S6] <i>Journal of Saudi Chemical Society</i> , 2024, <b>28</b> , 101821.                                    |

## References

1. F. F. P. Haris, A. Rajeev, M. M. Poyil, N. K. Kelappan and S. Sasi, *Environmental Science and Pollution Research*, 2024, **31**, 60298-60313.
2. S. M. Hosseini and V. Safarifard, *Surfaces and Interfaces*, 2024, **55**, 105399.
3. G. Karthik, S. Mohan and R. G. Balakrishna, *ACS ES&T Water*, 2024, **4**, 4454-4463.
4. S. Kumaravel, B. Avula, C. Chandrasatheesh, T. Niyitanga, R. Saranya, I. Hasan, T. Abisheik, R. S. Rai, V. Pandiyan and K. Balu, *Spectrochimica Acta Part A: Molecular and Biomolecular Spectroscopy*, 2024, **310**, 123972.
5. H. Mirzaei, M. H. Ehsani and A. Shakeri, *Scientific Reports*, 2025, **15**, 27276.
6. S. Mutahir, M. Asim Khan, Y. Qunhui, S. Mehboob, M. Bououdina, S. Mostafa Elkholi, A. Khan, R. A. Abumousa and M. Humayun, *Journal of Saudi Chemical Society*, 2024, **28**, 101821.
